# Supplementary material for: Importance ratings on patient-reported outcome items for survivorship care: comparison between pediatric cancer survivors, parents, and clinicians
Source: Springer Nature journal article supplement (doi:10.1007/s11136-018-1854-z), 2018-04-18
Supplement: MOESM1 [file 15705510]

**Title:**

Importance ratings on patient-reported outcome items for survivorship care: comparison between pediatric cancer survivors, parents, and clinicians

**Journal Name:**

Quality of Life Research

**Authors:**

Conor M. Jones,1 Justin N. Baker,2 Rachel M. Keesey,1 Ruth J. Eliason,1 Jennifer Q. Lanctot,1 Jennifer L. Clegg,3 Belinda N. Mandrell,4 Kirsten K. Ness,1 Kevin R. Krull,1 D. Kumar Srivastava,5 Christopher B. Forrest,3 Melissa M. Hudson,1,2 Leslie L. Robison,1 I-Chan Huang1*

**Affiliation:**

Departments of (1) Epidemiology and Cancer Control, (2) Oncology, (4) Pediatric Medicine, (5) Biostatistics, St. Jude Children’s Research Hospital, Memphis, TN and (3) Children’s Hospital of Philadelphia, Philadelphia, PA.

*** Corresponding Author:**

I-Chan Huang, PhD

Address: MS735, 262 Danny Thomas Place, Department of Epidemiology and Cancer Control, St. Jude Children’s Research Hospital, Memphis, TN 38105, USA

Phone: (901) 595-8369

E-mail: [i-chan.huang@stjude.org](mailto:i-chan.huang@stjude.org)

**Online Supplement**

A list of items in the PROMIS Pediatric item banks that were evaluated in this study, and % of participants who rated as importance

| **Pain Interference Item Bank** | **Children (N=101)** | **Parents (N=101)** | **Clinician (N=36)** |
| --- | --- | --- | --- |
| I felt angry when I had pain* | 38.6% | 43.6% | 24.3% |
| I had trouble doing schoolwork when I had pain* | 47.5% | 51.5% | 29.7% |
| I had trouble sleeping when I had pain | 59.4% | 61.4% | 81.1% |
| It was hard for me to pay attention when I had pain | 38.6% | 49.5% | 59.5% |
| It was hard for me to run when I had pain* | 27.7% | 17.8% | 13.5% |
| It was hard for me to walk one block when I had pain | 20.8% | 8.9% | 18.9% |
| It was hard to have fun when I had pain* | 34.7% | 26.7% | 35.1% |
| It was hard to stay standing when I had pain | 33.7% | 23.8% | 13.5% |
| I hurt a lot* | 52.5% | 48.5% | 54.1% |
| I hurt all over my body | 39.6% | 41.6% | 18.9% |
| I missed school when I had pain | 49.5% | 51.5% | 78.4% |
| It was hard for me to remember things when I had pain* | 23.8% | 29.7% | 8.1% |
| It was hard to get along with other people when I had pain* | 23.8% | 23.8% | 18.9% |
| It was hard for me to be away from home because I had pain* | 27.7% | 19.8% | 27.0% |
| It was hard to have fun with friends because I was in pain* | 38.6% | 32.7% | 56.8% |
| I needed help walking when I was in pain* | 20.8% | 26.7% | 16.2% |
| I walked carefully when I was in pain | 25.7% | 15.8% | 67.6% |
| I had so much pain I had to stop what I was doing | 55.4% | 49.5% | 13.5% |
| My pain was so bad that I needed to take medicine to treat it | 55.4% | 58.4% | 75.7% |
| It was hard to do things with my family because I had pain* | 29.7% | 38.6% | 43.2% |
| **Fatigue Item Bank** | **Children (N=101)** | **Parents (N=101)** | **Clinician (N=36)** |
| I got tired easily* | 41.2% | 42.6% | 23.7% |
| It was hard for me to get out of bed in the morning because I was too tired* | 45.1% | 36.6% | 42.1% |
| I felt too tired to spend time with my friends | 18.6% | 20.8% | 39.5% |
| I felt more tired than usual when I woke up in the morning* | 36.3% | 33.7% | 26.3% |
| I felt tired | 52.0% | 28.7% | 60.5% |
| I needed to sleep during the day | 39.2% | 41.6% | 71.1% |
| I was too tired to enjoy the things I like to do | 38.2% | 39.6% | 57.9% |
| I was too tired to watch television* | 13.7% | 16.8% | 15.8% |
| I was too tired to eat* | 23.5% | 20.8% | 26.3% |
| I was too tired to take a bath or shower* | 18.6% | 13.9% | 18.4% |
| I was too tired to do things outside* | 23.5% | 28.7% | 21.1% |
| I was so tired it was hard for me to pay attention | 53.9% | 40.6% | 23.7% |
| I was so tired it was hard for me to focus on my work* | 43.1% | 39.6% | 26.3% |
| Being tired made it hard for me to play or go out with my friends as much as I’d like* | 30.4% | 28.7% | 42.1% |
| I felt weak | 52.9% | 39.6% | 18.4% |
| Being tired kept me from having fun | 34.3% | 17.8% | 31.6% |
| I had trouble starting things because I was too tired* | 29.4% | 23.8% | 23.7% |
| I had trouble finishing things because I was too tired* | 41.2% | 37.6% | 42.1% |
| I was too tired to go up and down a lot of stairs* | 13.7% | 24.8% | 18.4% |
| I was too tired to go out with my family* | 22.5% | 15.8% | 34.2% |
| I was too tired to read* | 13.7% | 11.9% | 5.3% |
| Being tired made it hard for me to keep up with my schoolwork* | 49.0% | 42.6% | 52.6% |
| I was too tired to do sports or exercise* | 27.5% | 31.7% | 28.9% |
| **Psychological Stress Item Bank** | **Children (N=101)** | **Parents (N=101)** | **Clinician (N=36)** |
| I felt concerned about what was going on in my life | 33.7% | 49.5% | 43.2% |
| I felt stressed* | 57.4% | 58.4% | 73.0% |
| Small things upset me* | 61.4% | 56.4% | 56.8% |
| Everything bothered me* | 45.5% | 40.6% | 40.5% |
| I felt under pressure* | 54.5% | 49.5% | 43.2% |
| I felt that my problems kept piling up* | 35.6% | 31.7% | 54.1% |
| I felt overwhelmed* | 69.3% | 71.3% | 75.7% |
| I forgot things* | 48.5% | 38.6% | 32.4% |
| I felt like my thinking was slower than usual* | 26.7% | 22.8% | 16.2% |
| I felt unable to remember answers, even for questions I knew the answers to* | 43.6% | 46.5% | 29.7% |
| I felt so upset that I could not remember what happened or what I did* | 26.7% | 35.6% | 29.7% |
| I had trouble concentrating* | 48.5% | 48.5% | 59.5% |
| I had trouble making decisions* | 38.6% | 39.6% | 29.7% |
| I had trouble controlling my thoughts | 39.6% | 26.7% | 21.6% |
| My thoughts went very fast | 20.8% | 7.9% | 24.3% |
| I was slow to react to things | 20.8% | 11.9% | 5.4% |
| I felt unable to react to something that bothered me | 29.7% | 19.8% | 5.4% |
| I felt unable to manage things in my life* | 30.7% | 31.7% | 45.9% |
| I felt I had too much going on* | 41.6% | 40.6% | 59.5% |
| **Positive Affect Item Bank** | **Children (N=101)** | **Parents (N=101)** | **Clinician (N=36)** |
| I felt calm | 30.7% | 20.8% | 11.1% |
| I felt peaceful* | 14.9% | 10.9% | 27.8% |
| I felt satisfied | 29.7% | 14.9% | 27.8% |
| I felt content | 9.9% | 19.8% | 22.2% |
| I felt grateful* | 23.8% | 18.8% | 8.3% |
| I felt thankful* | 27.7% | 26.7% | 13.9% |
| I felt positive* | 37.6% | 30.7% | 25.0% |
| I felt carefree* | 23.8% | 16.8% | 8.3% |
| I felt relaxed* | 34.7% | 31.7% | 19.4% |
| I felt comfortable | 31.7% | 33.7% | 13.9% |
| I felt fulfilled* | 8.9% | 6.9% | 19.4% |
| I felt respected* | 22.8% | 16.8% | 11.1% |
| I felt appreciated | 32.7% | 28.7% | 8.3% |
| I felt proud* | 18.8% | 27.7% | 16.7% |
| I had much to be proud about* | 24.8% | 35.6% | 22.2% |
| I felt pleased* | 12.9% | 5.9% | 5.6% |
| I felt great | 25.7% | 12.9% | 36.1% |
| I felt cheerful* | 14.9% | 15.8% | 16.7% |
| I felt happy | 37.6% | 34.7% | 63.9% |
| I had very strong happy feelings* | 23.8% | 18.8% | 22.2% |
| I felt joyful | 26.7% | 10.9% | 19.4% |
| I felt delighted | 10.9% | 3.0% | 0.0% |
| I smiled a lot* | 40.6% | 49.5% | 30.6% |
| I laughed a lot* | 40.6% | 50.5% | 33.3% |
| I was merry* | 5.9% | 4.0% | 0.0% |
| I was in a good mood* | 50.5% | 41.6% | 58.3% |
| I was in good spirits* | 21.8% | 30.7% | 27.8% |
| I felt good* | 18.8% | 20.8% | 16.7% |
| I felt blissful* | 1.0% | 2.0% | 2.8% |
| I felt enthusiastic* | 16.8% | 16.8% | 16.7% |
| I had a lot of energy* | 40.6% | 37.6% | 33.3% |
| I felt wide awake | 23.8% | 12.9% | 5.6% |
| I felt refreshed | 25.7% | 12.9% | 5.6% |
| I felt active | 30.7% | 30.7% | 8.3% |
| I felt full of pep* | 12.9% | 14.9% | 22.2% |
| I felt strong | 32.7% | 12.9% | 33.3% |
| I felt healthy* | 28.7% | 27.7% | 13.9% |

* Importance rating was not significantly different either between clinicians and children or between parents and children.
